# Supplementary material for: Enhanced hydrogen production via assisted biomass gasification using lithium manganate as a bifunctional material
Source: Royal Society of Chemistry journal article supplement (doi:10.1039/d4ta00224e), 2024-01-01
Supplement: d4ta00224e1.pdf [file d4ta00224e1.pdf]

## Supplementary Information

### Enhanced Hydrogen Production by Assisted Biomass Gasification Using Lithium Manganate as a Bifunctional Material

Carlos Hernández-Fontes, Nan Wang, Nayeli Gómez-Garduño and Heriberto Pfeiffer\*

*Instituto de Investigaciones en Materiales, Universidad Nacional Autónoma de México, Circuito exterior s/n, Cd.*

*Universitaria, Del. Coyoacán, CP. 04510, Ciudad de México, Mexico*

\*Corresponding author; [pfeiffer@materiales.unam.mx](mailto:pfeiffer@materiales.unam.mx) (H. Pfeiffer).

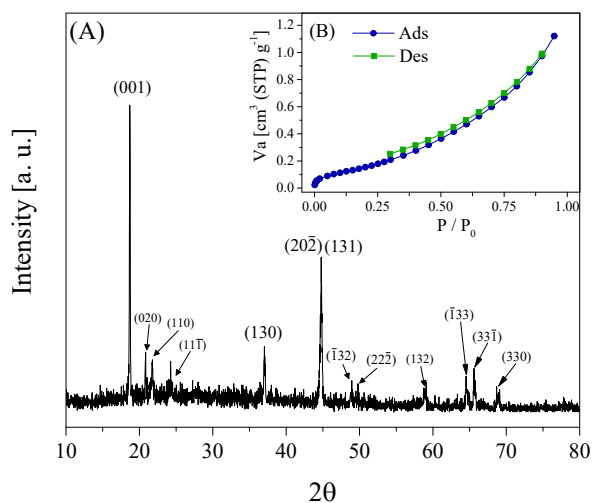

**Figure S1.** Characterization techniques of synthesized Li<sub>2</sub>MnO<sub>3</sub>; XRD (A) and Ads-des N<sub>2</sub> isotherm (B).

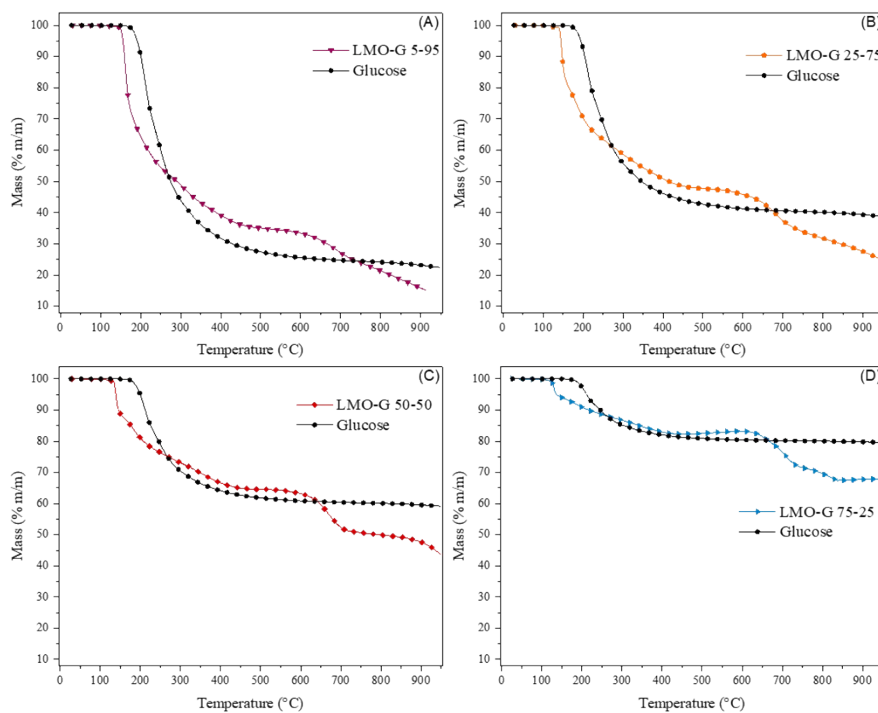

**Figure S2.** Thermogravimetric analyses from mixtures of different  $\text{Li}_2\text{MnO}_3$  and glucose ratios: 5-95 (A), 25-75 (B), 50-50 (C), 75-25 (D) at  $5\text{ }^\circ\text{C min}^{-1}$  in  $\text{N}_2$  flow. Glucose sample was added in all the cases normalized in every case for the weight content in the sample.

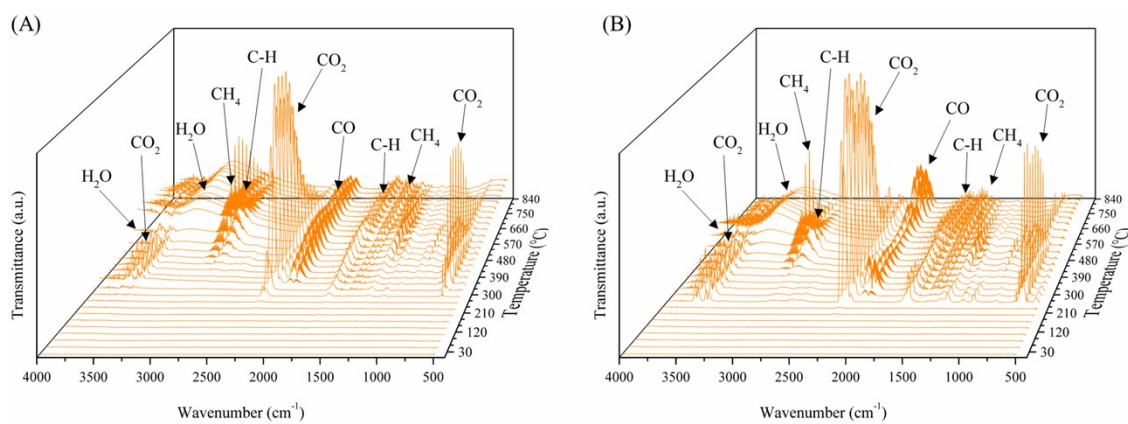

**Figure S3.** FTIR gas-cell measurements of the gas products from pyrolysis of glucose (A) and LMO-G 25-75 (B) samples, as a function of temperature.

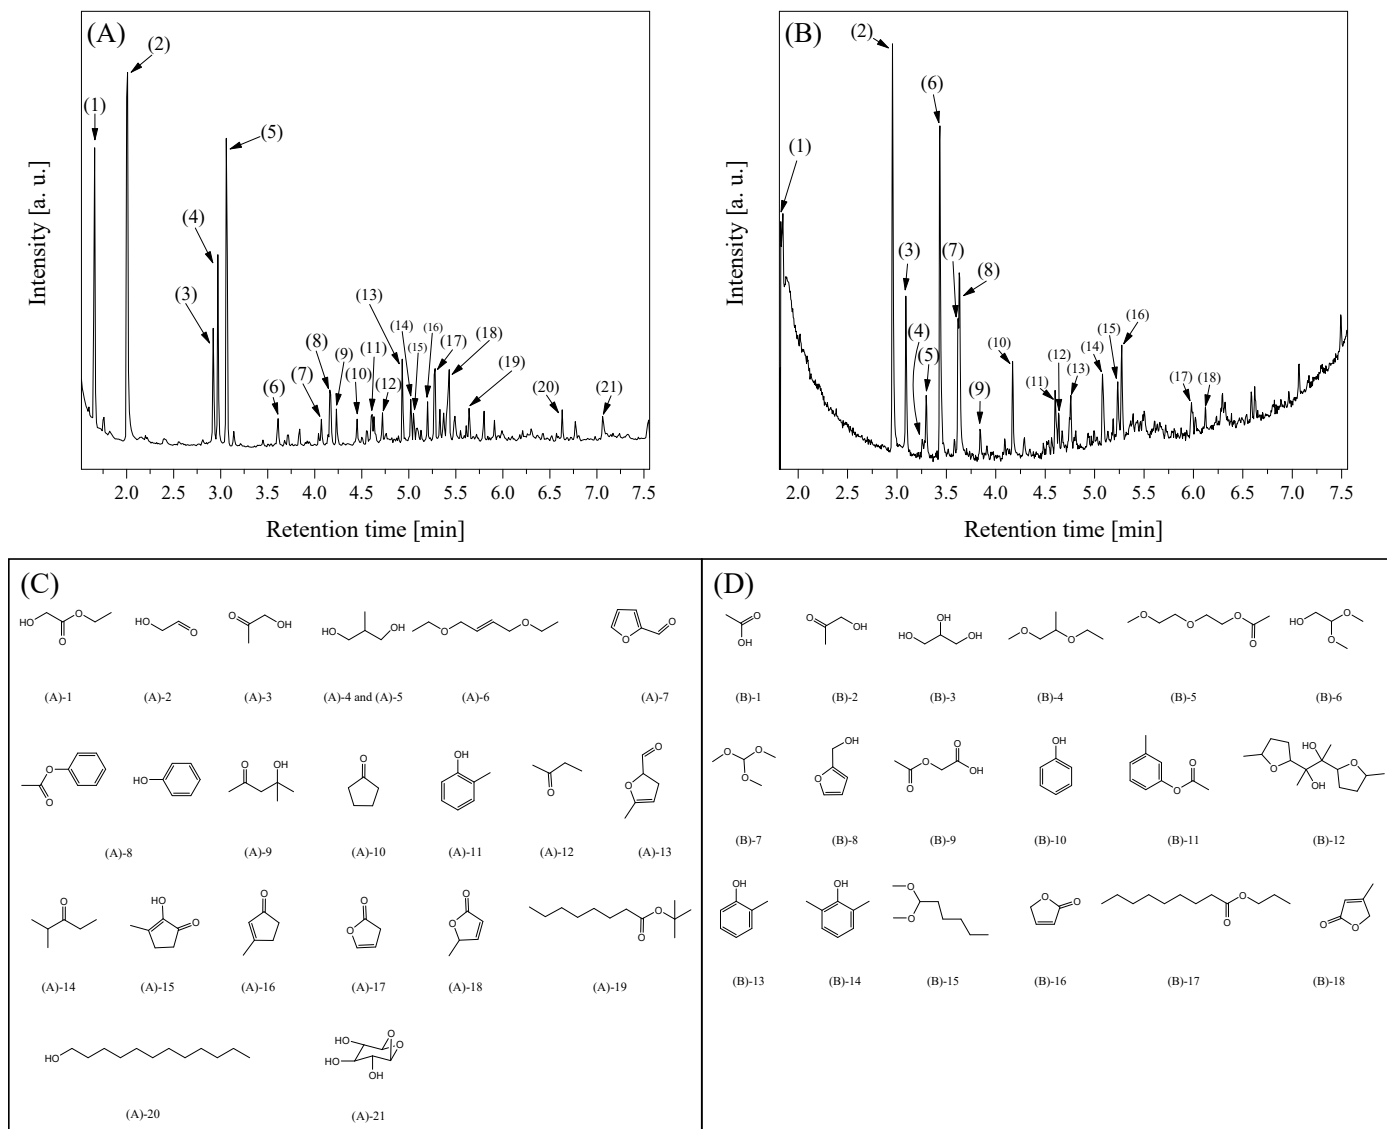

**Figure S4.** Gas chromatograms of the condensable volatile products of pyrolysis of glucose (A) and LMO-G 25-75 (B) samples, as well as the identification of the numbered peaks through mass spectrometry (C) and (D), respectively.

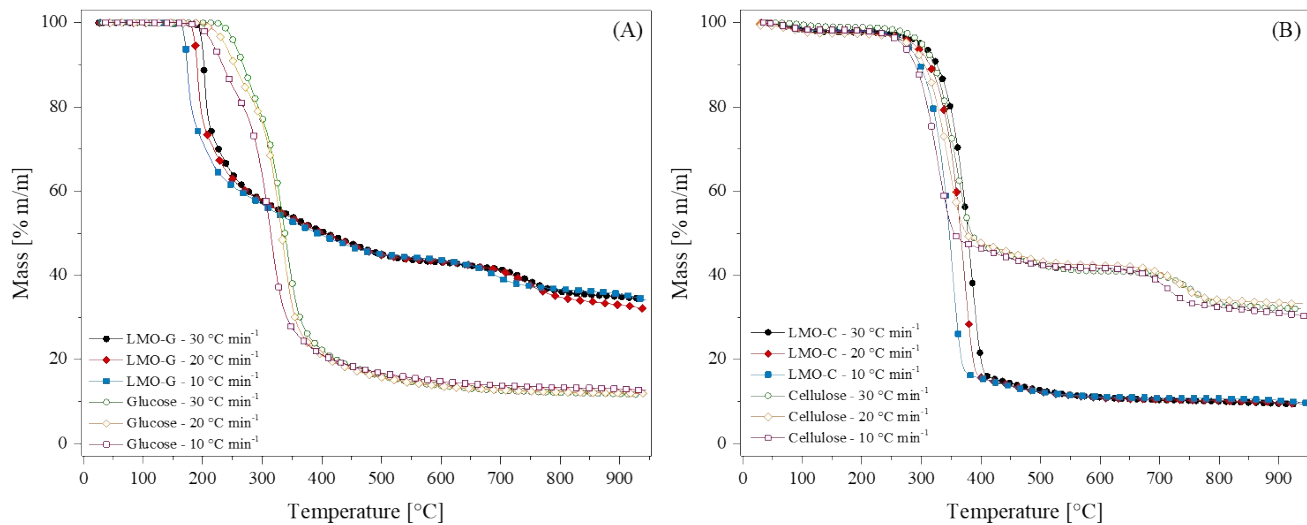

**Figure S5.** Thermogravimetric analyses from mixtures of different biomass types: glucose (A) and cellulose (B), with or without  $\text{Li}_2\text{MnO}_3$  at different heating rates, from 10 to 30 °C min<sup>-1</sup> in  $\text{N}_2$  flow.
